# Supplementary material for: tailfindr: alignment-free poly(A) length measurement for Oxford Nanopore RNA and DNA sequencing
Source: PubMed Central journal article supplement (PMC6800471; doi:10.1261/rna.071332.119), 2019-10

**A**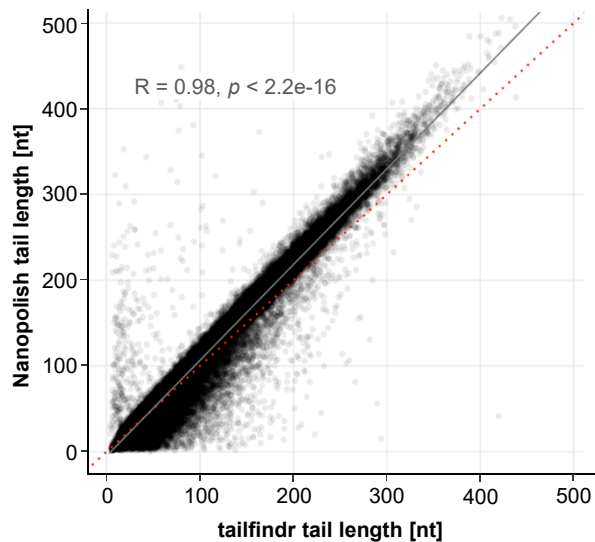**B**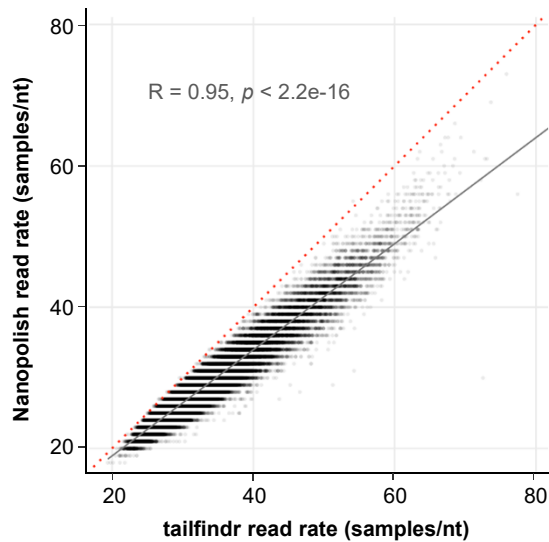**C**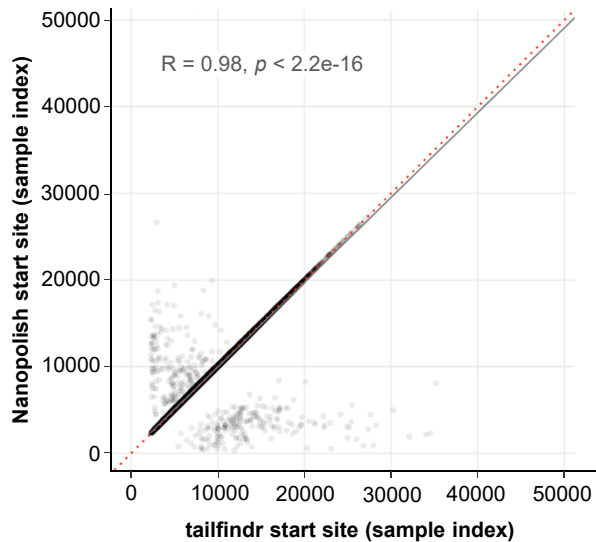**D**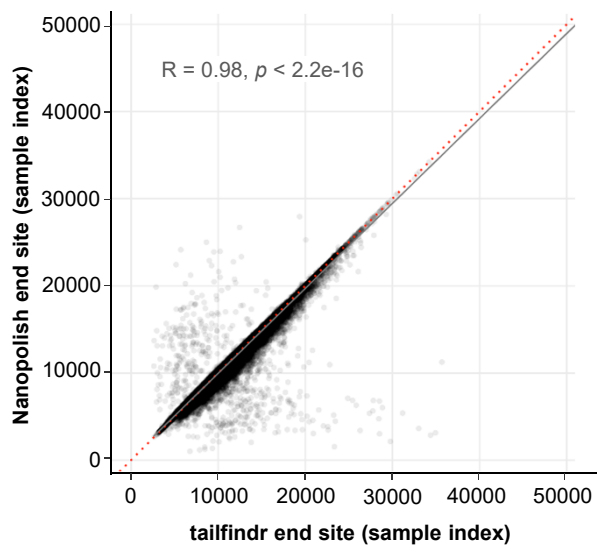

Supplement: supp_071332.119_Supplemental_FigS3.pdf [file supp_071332.119_Supplemental_FigS3.pdf]
