# Supplementary material for: tailfindr: alignment-free poly(A) length measurement for Oxford Nanopore RNA and DNA sequencing
Source: PubMed Central journal article supplement (PMC6800471; doi:10.1261/rna.071332.119), 2019-10

**A**

| read_id                               | tail_start | tail_end | samples_per_nt | tail_length | file_path                                           |
|---------------------------------------|------------|----------|----------------|-------------|-----------------------------------------------------|
| 56aae807-0f20-4e28-a5e2-5a9c2b1e1509  | 5701       | 8176     | 41.16          | 60.13       | /export/valenfs/data/processed_data/MinION/20181... |
| 56aa4686-d5f3-4d79-901d-736ad71f4aa5  | 9084       | 9884     | 57.25          | 13.97       | /export/valenfs/data/processed_data/MinION/20181... |
| 56ae532c-6199-4611-8e77-f7e4233f3431  | 10824      | 12324    | 48.79          | 30.75       | /export/valenfs/data/processed_data/MinION/20181... |
| 88f00dc8-607b-47b0-a9db-1123cca05934  | 9380       | 10755    | 55.17          | 24.92       | /export/valenfs/data/processed_data/MinION/20181... |
| 9b3ae14c-46b7-4577-abe3-01481cf4a457  | 8057       | 9232     | 48.57          | 24.19       | /export/valenfs/data/processed_data/MinION/20181... |
| abl1d2036-5e4c-417b-8f48-1855b0246a23 | 6505       | 12005    | 41.23          | 133.41      | /export/valenfs/data/processed_data/MinION/20181... |
| 2c66c4e0-e314-42f4-81f4-94cbf8a4a6c3  | 8030       | 9905     | 48.85          | 38.38       | /export/valenfs/data/processed_data/MinION/20181... |
| fb147523-d1ad-45f2-9dab-c69c54082c0a  | 8726       | 9726     | 52.81          | 18.93       | /export/valenfs/data/processed_data/MinION/20181... |
| 11cc0eac-0410-4f8c-8c27-88a1c7492da3  | 9633       | 11258    | 44.85          | 36.23       | /export/valenfs/data/processed_data/MinION/20181... |

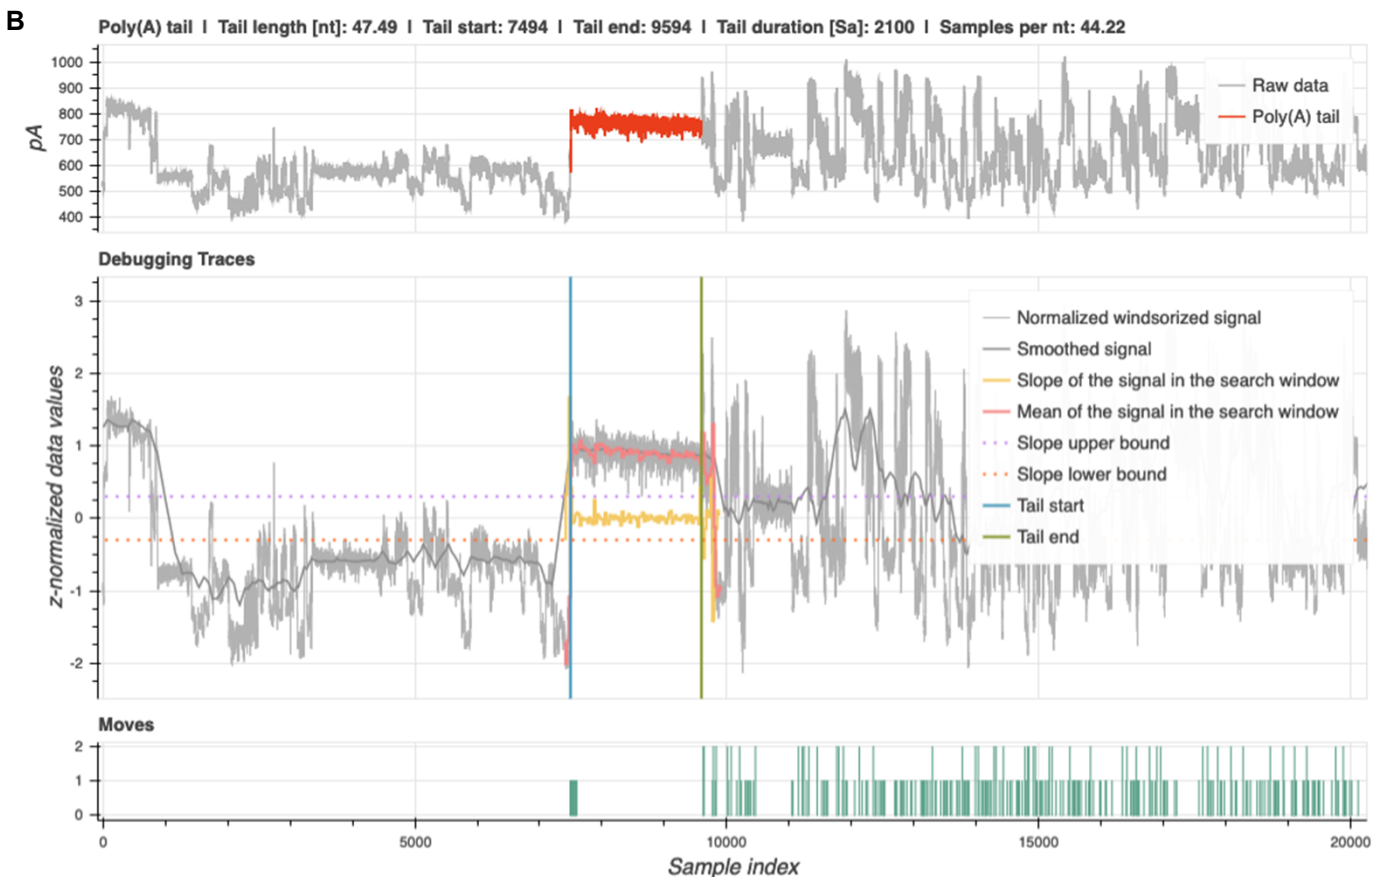

Supplement: supp_071332.119_Supplemental_FigS4.pdf [file supp_071332.119_Supplemental_FigS4.pdf]
