# Supplementary material for: tailfindr: alignment-free poly(A) length measurement for Oxford Nanopore RNA and DNA sequencing
Source: PubMed Central journal article supplement (PMC6800471; doi:10.1261/rna.071332.119), 2019-10

| read_id                              | read_type | tail_is_valid | tail_start | tail_end | samples_per_nt | tail_length | file_path                           |
|--------------------------------------|-----------|---------------|------------|----------|----------------|-------------|-------------------------------------|
| cc4daa24-7875-427e-9aae-82fbacfc4052 | invalid   | FALSE         | NA         | NA       | 8.00           | NA          | /export/valenfs/data/processed_data |
| cc9281a2-cfe7-437f-ad29-2ecff087174c | invalid   | FALSE         | NA         | NA       | 8.00           | NA          | /export/valenfs/data/processed_data |
| f41f79b3-e8e2-4e92-8253-a1d6bb6a8241 | polyA     | TRUE          | 7787       | 8007     | 8.01           | 27.48       | /export/valenfs/data/processed_data |
| 36b16025-2296-47d9-aeel-6041e39a5dc1 | polyT     | TRUE          | 572        | 1492     | 8.01           | 114.90      | /export/valenfs/data/processed_data |
| fe305589-7070-42af-81b6-b1793fcd6a10 | polyA     | FALSE         | NA         | NA       | 8.01           | NA          | /export/valenfs/data/processed_data |
| 30884743-6453-46be-8cd1-17449d21d430 | polyA     | FALSE         | NA         | NA       | 8.01           | NA          | /export/valenfs/data/processed_data |
| c0c2e47b-5931-4a9d-9a04-8f5f23dda00a | polyT     | TRUE          | 983        | 1233     | 8.02           | 31.16       | /export/valenfs/data/processed_data |
| 1879fca0-f395-4d5e-92f0-e5d35d302183 | polyT     | TRUE          | 944        | 1454     | 8.02           | 63.55       | /export/valenfs/data/processed_data |
| 23f0d75a-6b24-4512-88b8-6f9661f23a45 | polyA     | FALSE         | NA         | NA       | 8.02           | NA          | /export/valenfs/data/processed_data |
| e0d3cb1e-fbaa-43e6-94a9-6110cd74c677 | invalid   | FALSE         | NA         | NA       | 8.02           | NA          | /export/valenfs/data/processed_data |
| 7f959c69-a2db-4e86-996d-ee6064bdecb0 | invalid   | FALSE         | NA         | NA       | 8.02           | NA          | /export/valenfs/data/processed_data |
| 7955afb7-ef49-49b6-8e88-cc23722a8a88 | polyA     | TRUE          | 7766       | 7896     | 8.03           | 16.18       | /export/valenfs/data/processed_data |
| e6c5f92d-1b59-460f-a26c-b71bd5835965 | polyT     | TRUE          | 983        | 1193     | 8.03           | 26.15       | /export/valenfs/data/processed_data |

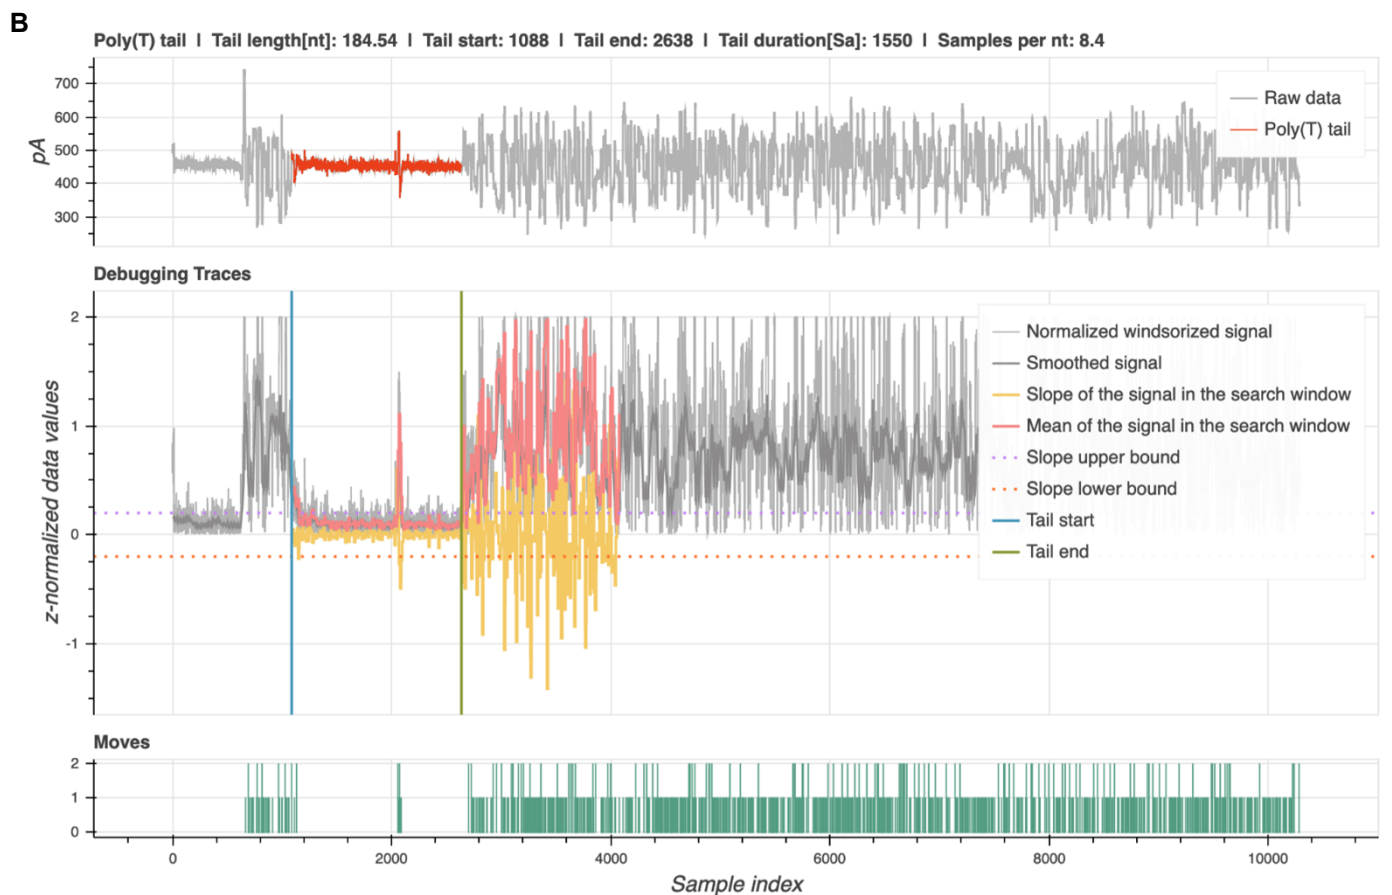

Supplement: supp_071332.119_Supplemental_FigS5.pdf [file supp_071332.119_Supplemental_FigS5.pdf]
