# Supplementary material for: tailfindr: alignment-free poly(A) length measurement for Oxford Nanopore RNA and DNA sequencing
Source: PubMed Central journal article supplement (PMC6800471; doi:10.1261/rna.071332.119), 2019-10

SQK-LSK 108

SQK-LSK 109

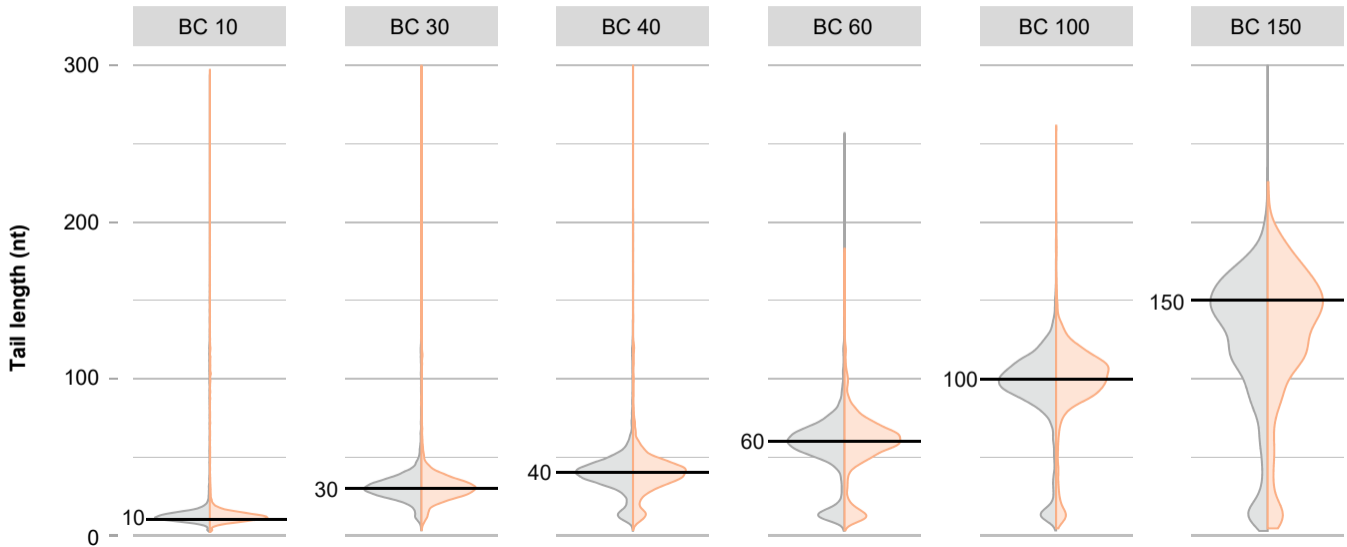

Supplement: supp_071332.119_Supplemental_FigS7.pdf [file supp_071332.119_Supplemental_FigS7.pdf]
